# Supplementary material
Source: JCI journal article supplement (doi:10.1172/jci158002)
Supplement: sd1 [file 1]

A

## Day 28 pathology and HALO software analysis

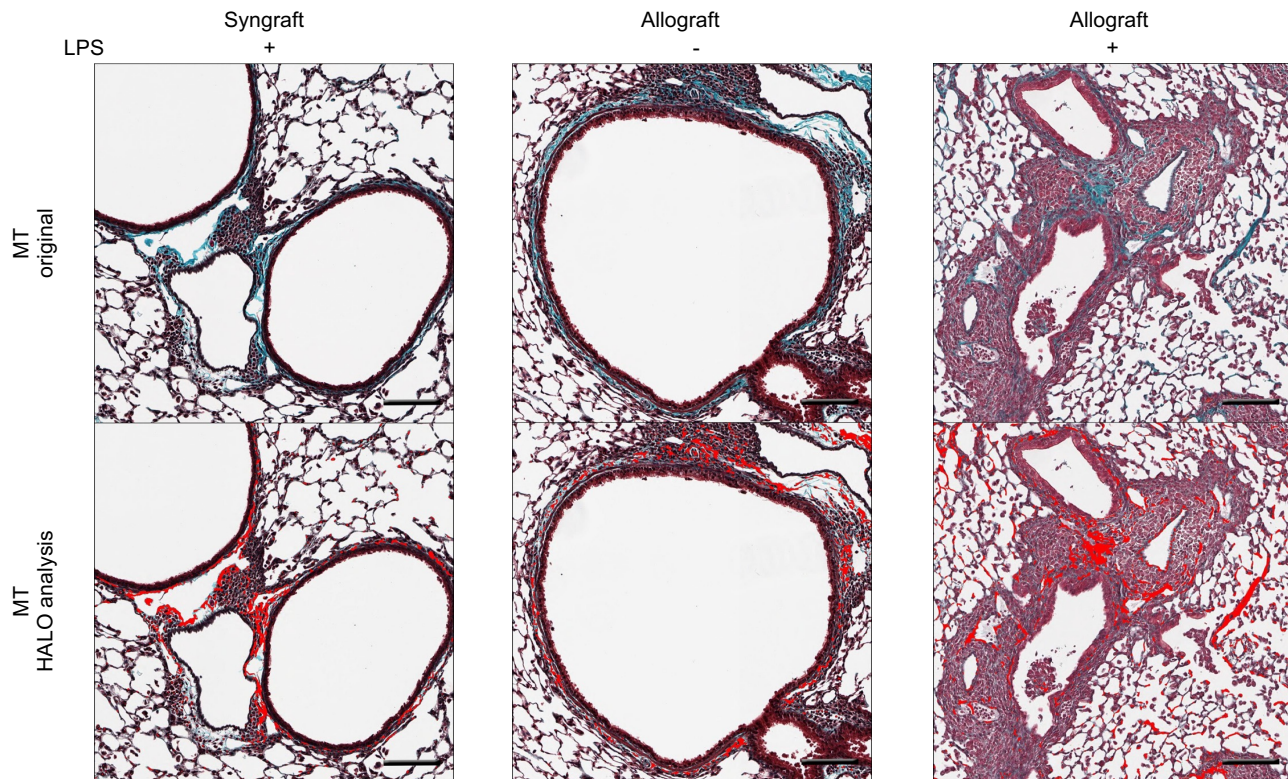

B

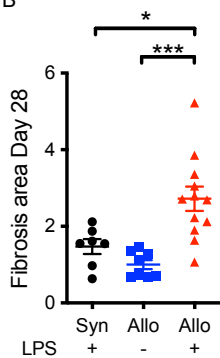

C

Day 42 pathology

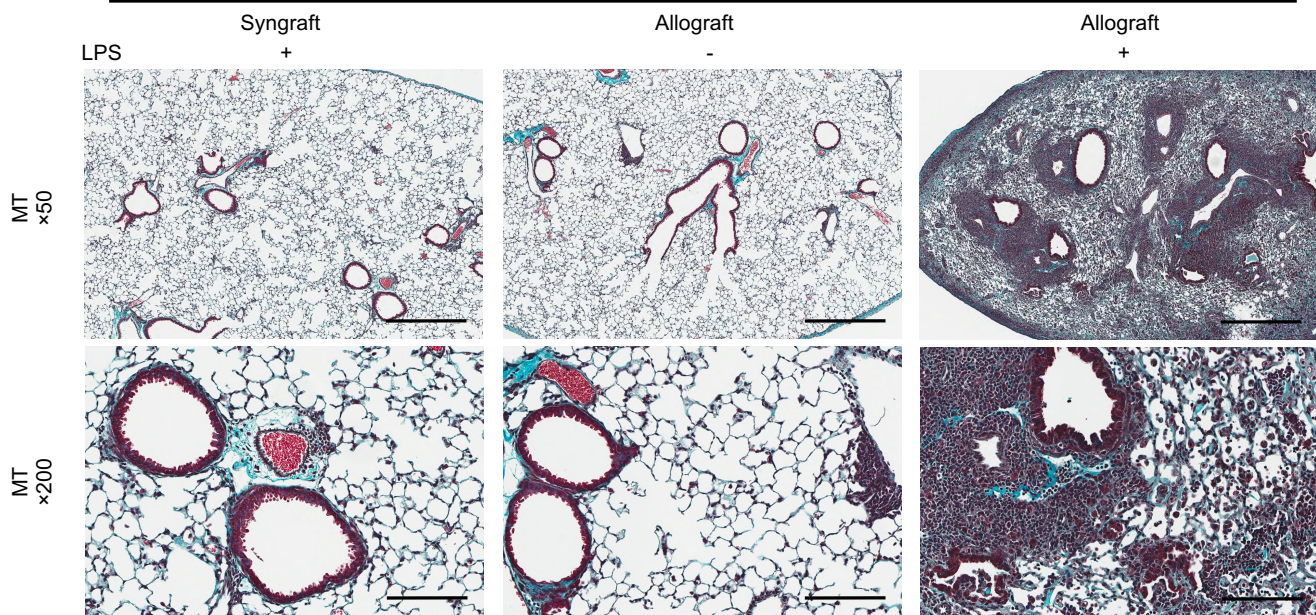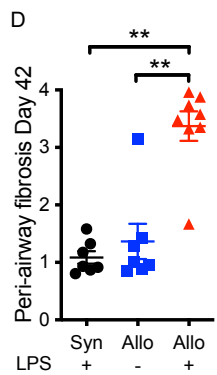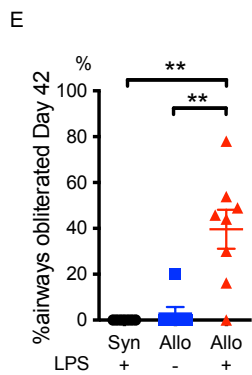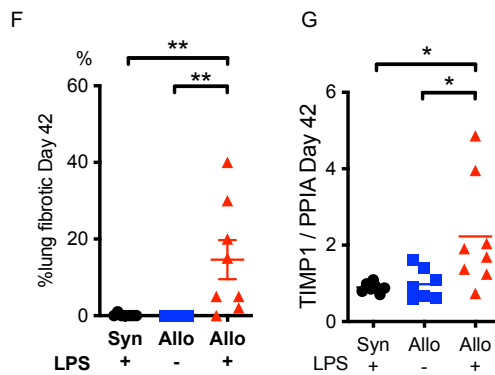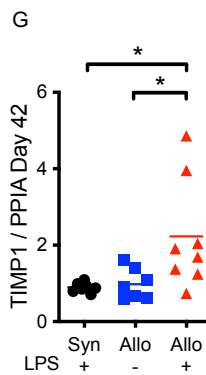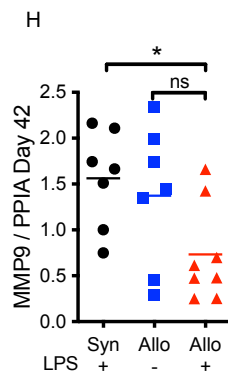

### **Supplemental Figure S1. Chronic rejection pathology quantification at day 28 and 42.**

B6 recipient mice received a single left lung transplant from B6 or B10 donor mice, followed by repeated intra-tracheal LPS vs. PBS exposures. (A) Representative images of graft MT staining on day 28 after lung transplantation used for HALO software analysis. Upper pictures show MT staining imaged by light microscopy. Lower pictures show green fibrotic areas recognized and identified in red by HALO software. Left: LPS-syngrafts. Middle: PBS-allograft. Right: LPS-allograft. scale bar: 100 $\mu$ m. (B) Fibrotic green areas identified by HALO software normalized to the average %fibrotic area of PBS-allograft (n=7-12).

(C) Representative images of MT staining on day 42 after lung transplantation. Scale bar: 200 $\mu$ m. Left: LPS-syngrafts. Middle: PBS-allograft. Right: LPS-allograft. LPS-syngrafts and PBS-allografts showed no obvious fibrosis. LPS-allografts showed augmented peri-airway fibrosis and obliterated airways. (D, E, and F) Fibrotic change scores of the lung grafts (n=7 and 8 per group). (D) Peri-airway fibrosis scores. (E) Percentage of obliterated airways. (F) Percentage of lung fibrosis grading. (G) TIMP1 transcript normalized to PPIA in the grafts at day 42. (H) Lung graft MMP9 transcript normalized to PPIA at day 42. Kruskal-Wallis test. \*\* $p$ < 0.01; \*\*\* $p$ <0.001.

**A**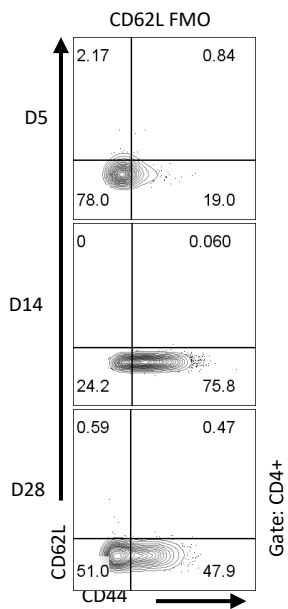**B**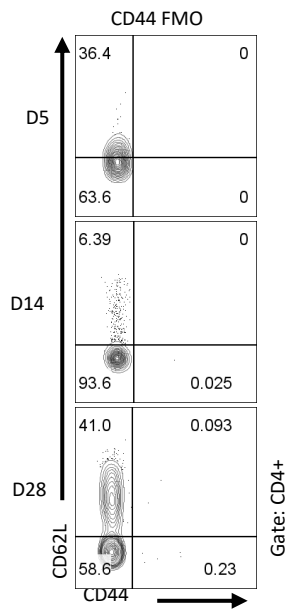

**Supplemental Figure S2. Plots showing fluorescence-minus-one controls for CD62L and CD44.**

B6 recipient mice received a single left lung transplant from B6 or B10 donor mice, followed by repeated intra-tracheal LPS vs. PBS exposures. Samples were obtained from LPS-syngraft, PBS-allograft, and LPS-allograft on days 5, 14, and 28. Lung graft cells were subjected to flow cytometry. CD4<sup>+</sup> cells were gated. FMO, fluorescence-minus-one controls for CD62L and CD44 are shown for each timepoint. (A) CD62L. (B) CD44.

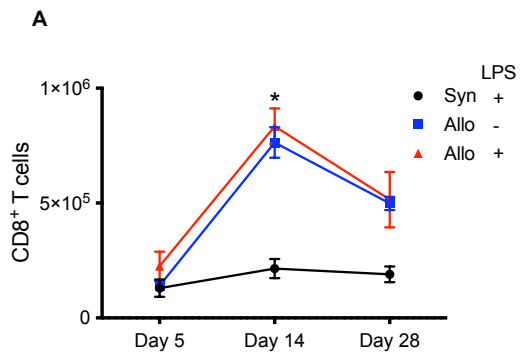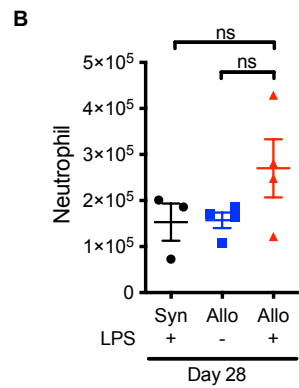

**Supplemental Figure S3. Additional flow cytometry plots showing CD8 T cells and neutrophils in mouse syngrafts and allografts under LPS stimulation.**

B6 recipient mice received a single left lung transplant from B6 or B10 donor mice, followed by repeated intra-tracheal LPS vs. PBS exposures. (A) The number of CD8<sup>+</sup> T cells in the lung grafts. Kruskal-Wallis test. LPS-syngrafts vs LPS-allografts, \* $p < 0.05$ . (B) The number of neutrophils in the lung graft on day 28. Kruskal-Wallis test.

A

AlloLPS Day 28  
IL17RA/CD45 / DAPI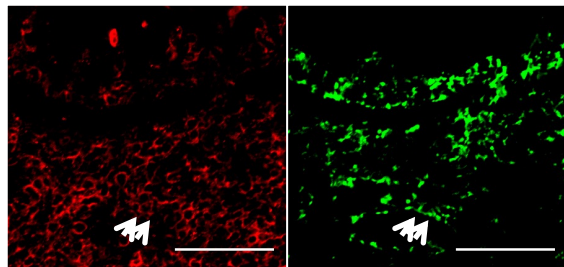

B

AlloLPS Day 28  
IL17RA/aSMA / DAPI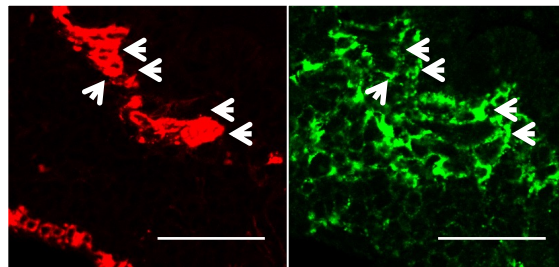

C

AlloLPS Day 28  
IL17RA/Collagen / DAPI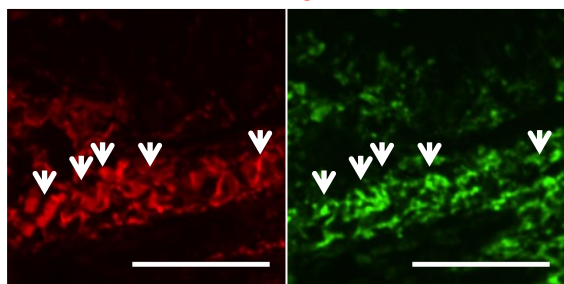

D

AlloLPS Day 28  
IL17RA/CD31 / DAPI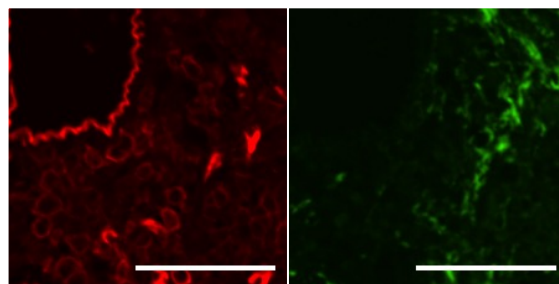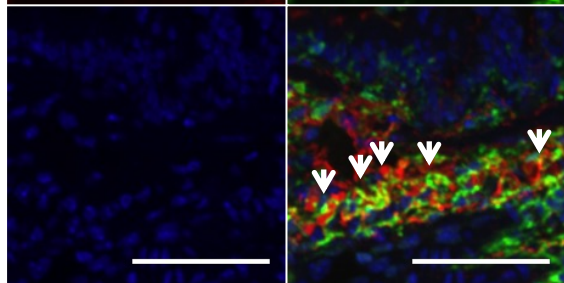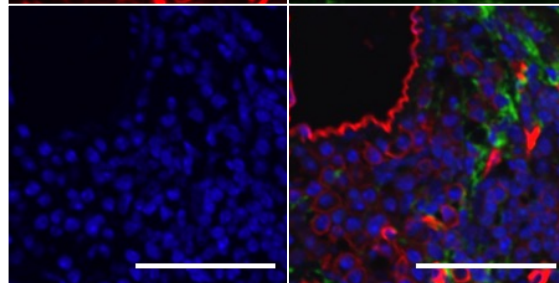

E

AlloLPS Day 28

IL17RA/LYVE1 / DAPI

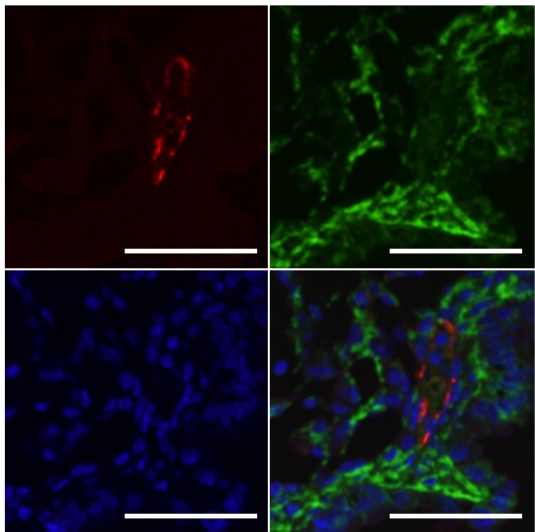

#### **Supplemental Figure S4. Immunofluorescence of mouse lung grafts on day 28**

B6 recipient mice received a single left lung transplant from B6 or B10 donor mice, followed by repeated intra-tracheal LPS vs. PBS exposures. Samples were obtained on day 28. Representative pictures of immunofluorescence of lung grafts are shown. The merged pictures are also shown in Figure 8E. (A) Immunofluorescence of the lung grafts for IL17RA and CD45. Green: IL17RA, Red: CD45, Blue: DAPI. Scale bar: 50 $\mu$ m. Arrows indicate CD45 and IL17RA double-positive staining. (B) Immunofluorescence of the lung grafts for IL17RA and  $\alpha$ SMA. Green: IL17RA, Red:  $\alpha$ SMA, Blue, DAPI. Scale bar: 50 $\mu$ m. Arrows indicate IL17RA and  $\alpha$ SMA double-positive staining. (C) Immunofluorescence of the lung grafts for IL17RA and Collagen. Green: IL17RA, Red: collagen, Blue: DAPI. Scale bar: 50 $\mu$ m. Arrows indicate IL17RA and Collagen double-positive staining. (D) Immunofluorescence of the lung grafts for IL17RA and CD31. Green: IL17RA, Red: collagen, Blue: DAPI. Scale bar: 50 $\mu$ m. (E) Immunofluorescence of the lung grafts for IL17RA and LYVE1. Green: IL17RA, Red: LYVE1, Blue: DAPI. Scale bar: 50 $\mu$ m.

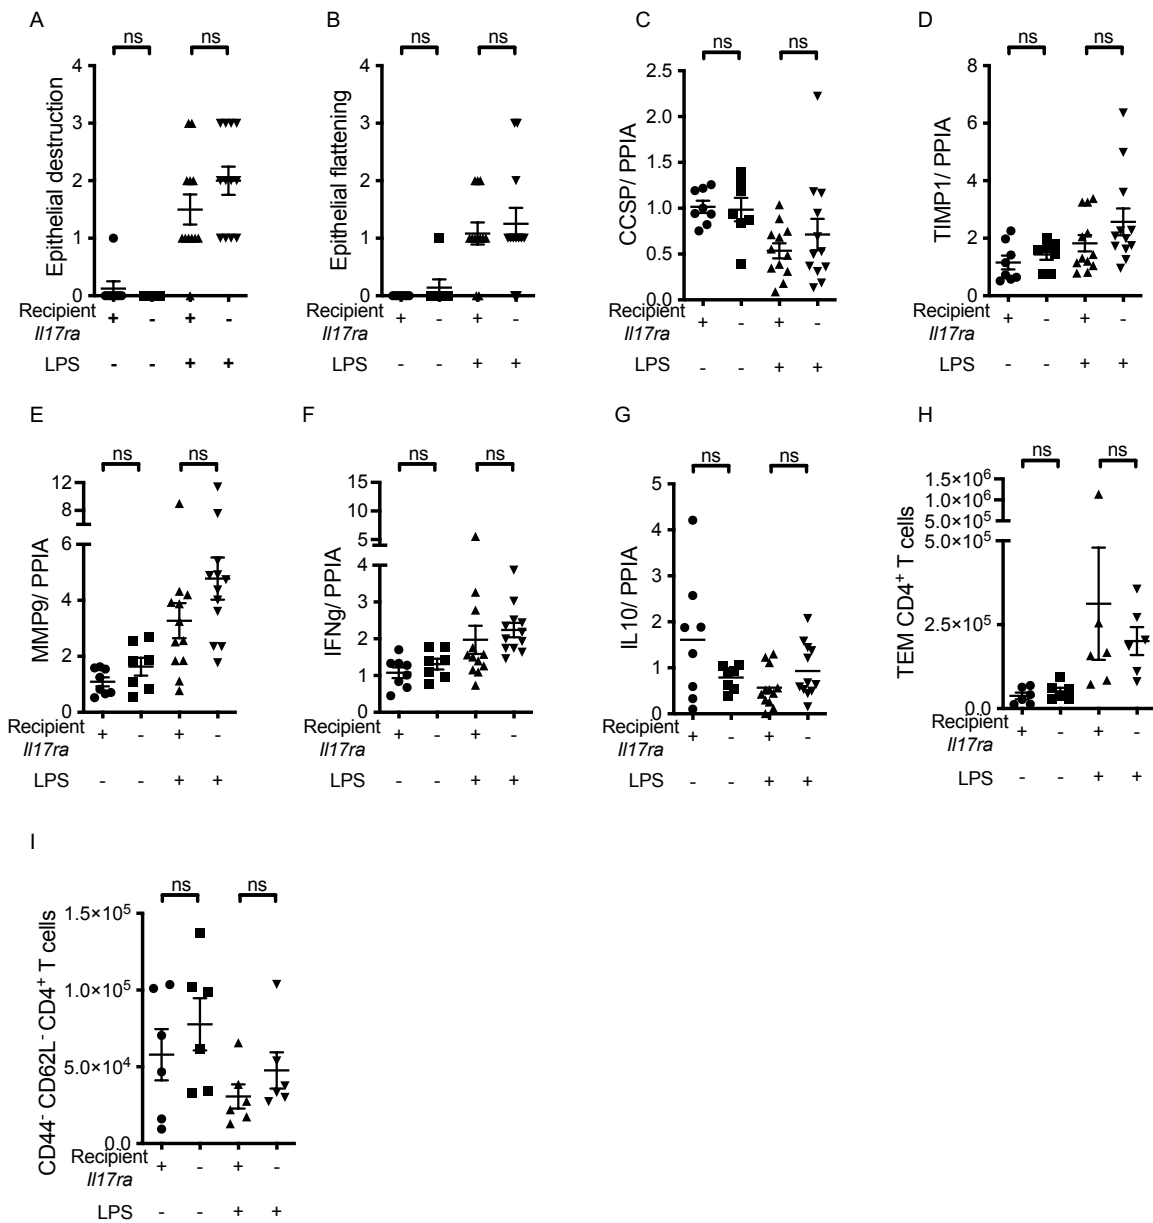

**Supplemental Figure S5. Epithelial changes, levels of CCSP, TIMP1, IFN $\gamma$ , and IL10 transcripts, and CD4<sup>+</sup> T cell subsets in IL17RA-deficient lung transplant recipient mice**

The experimental groups are as follows: Wild type B6 (WT) mice transplanted with B10 lung and *Il17ra*<sup>-/-</sup> mice transplanted with B10 lung under basal condition (n=8 or 7) or under repeated LPS exposures (n=12 each). Under repeated LPS conditions, recipient mice received 6 doses of intra-tracheal LPS (5 $\mu$ g in 50 $\mu$ l PBS) on serial (2/week) postoperative days from day 3 to day 21. The grafts were analyzed on day 28. (A and B) Airway epithelial scores in the lung grafts on day 28 (n=7-12 per group). (A) Epithelial destruction scores. (B) Epithelial flattening scores. (C-G) Transcript levels of CCSP, TIMP1, MMP9, IFN $\gamma$ , and IL10 in lung allografts on day 28 (n=7-12 per group). (C) Relative expression of CCSP transcripts normalized to PPIA. (D) Relative expression of TIMP1 transcripts normalized to PPIA. (E) Relative expression of MMP9 transcripts normalized to PPIA. (F) Relative expression of IFN $\gamma$  transcripts normalized to PPIA. (G) Relative expression of IL10 transcripts normalized to PPIA. (H and I) Subsets of CD4<sup>+</sup> T cells in lung allografts assessed by lung cell flow cytometry on day 28 (n=6 each). (H) Effector memory CD4<sup>+</sup> T cells (CD44<sup>+</sup>CD62L<sup>-</sup>CD4<sup>+</sup> T cells, TEM). (I) CD44<sup>-</sup>CD62L<sup>-</sup>CD4<sup>+</sup> T cells. Mann-Whitney test. \*\*\* $p < 0.001$ .

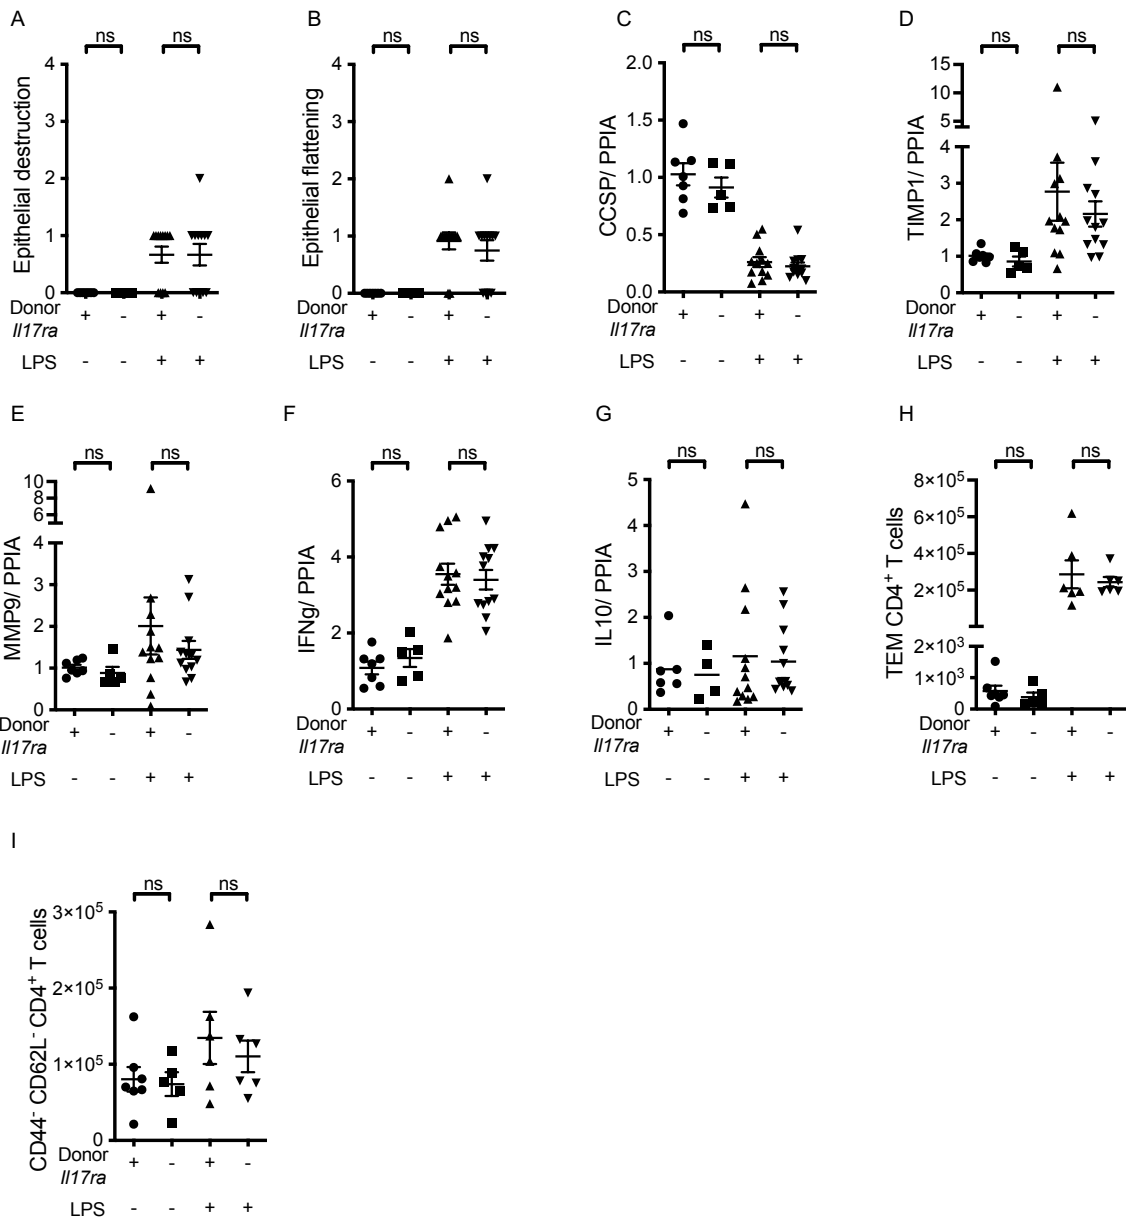

**Supplemental Figure S6. Epithelial damage, levels of CCSP, TIMP1, MMP9, IFN $\gamma$ , and IL10 transcripts, and CD4 $^+$  T cell subsets in IL17RA-deficient donor lung allografts**

Experimental groups are as follows: B10 mice transplanted with WT lung or *Il17ra*<sup>-/-</sup> lung under basal condition (n=7 or 5) or under repeated LPS exposures (n=12 each). Under repeated LPS conditions, recipient mice received 6 doses of intra-tracheal LPS (5 $\mu$ g in 50 $\mu$ l PBS) on serial (2/week) postoperative days from day 3 to day 21. The grafts were analyzed on day 28. (A and B) Airway epithelial scores in the lung grafts on day 28 (n=5-12 per group). (A) Epithelial destruction scores. (B) Epithelial flattening scores. (C-G) Transcript levels of CCSP, TIMP1, MMP9, IFN $\gamma$ , and IL10 in the lung allografts on day 28 (n=5-12 per group). (C) Relative expression of CCSP transcripts normalized to PPIA. (D) Relative expression of TIMP1 transcripts normalized to PPIA. (E) Relative expression of MMP9 transcripts normalized to PPIA. (F) Relative expression of IFN $\gamma$  transcripts normalized to PPIA. (G) Relative expression of IL10 transcripts normalized to PPIA. (H and I) Subsets of CD4 $^+$  T cells in lung allografts assessed by lung cell flow cytometry on day 28 (n=5-7 per group). (H) Effector memory CD4 $^+$  T cells (CD44 $^+$ CD62L $^-$ CD4 $^+$  T cells, TEM). (I) CD44 $^-$ CD62L $^-$ CD4 $^+$  T cells. Mann-Whitney test.

## Supplemental Table 1: Clinical data of re-transplant recipients

|                                     | Case1              | Case 2                                                        | Case 3                                | Case 4                                                                         | Case 5                                                                  | Case 6                                                                                               |
|-------------------------------------|--------------------|---------------------------------------------------------------|---------------------------------------|--------------------------------------------------------------------------------|-------------------------------------------------------------------------|------------------------------------------------------------------------------------------------------|
| Age: at re-Tx                       | 50                 | 36                                                            | 24                                    | 29                                                                             | 59                                                                      | 34                                                                                                   |
| Gender                              | M                  | F                                                             | F                                     | M                                                                              | F                                                                       | M                                                                                                    |
| Primary disease                     | COPD               | BPD                                                           | Cystic Fibrosis                       | Cystic Fibrosis                                                                | Pulmonary Fibrosis                                                      | Pulmonary Fibrosis                                                                                   |
| IS baseline                         | csa/aza/pred       | csa/mm/f/pred                                                 | csa/mm/f/pred                         | csa/aza/pred                                                                   | csa/aza/pred                                                            | csa/aza/pred                                                                                         |
| IS at re-Tx                         | tac/mm/f/pred      | tac/mm/f/pred                                                 | tac/mm/f/pred                         | tac/mm/f/pred                                                                  | tac/mm/f/pred                                                           | tac/mm/f/pred                                                                                        |
| HLA mismatch (A/B/C/DR/DQ)          | 7/10               | 7/10                                                          | 6/10                                  | 6/10                                                                           | 7/10                                                                    | 9/10                                                                                                 |
| 1st dnDSA                           | DQ                 | DQA5-DQB2                                                     | B8, DQ9                               | none                                                                           | DQA5                                                                    | DRw53, DQ7, DQA3                                                                                     |
| Time to 1st dnDSA, days             | 84                 | 32                                                            | 433                                   | N/A                                                                            | 94                                                                      | 86                                                                                                   |
| CMV status                          | D-/R+              | D-/R-                                                         | D+/R+                                 | D-/R-                                                                          | D+/R+                                                                   | D+/R+                                                                                                |
| Pulmonary pathogens <sup>a</sup>    | <b>Haemophilus</b> | <b>Haemophilus,</b><br>Aspergillus,<br>Mycobacterium<br>Avium | <b>Pseudomonas,</b><br>Staphylococcus | <b>Haemophilus,</b><br>Aspergillus,<br>Influenza B virus<br><b>Pseudomonas</b> | <b>Escherichia coli,</b><br>Staphylococcus,<br>Aspergillus, CMV,<br>RSV | <b>Mycoplasma,</b><br><b>Pseudomonas,</b><br>Aspergillus,<br>CMV, RSV,<br>Mycobacterium<br>fortuitum |
| Steroid pulses before CLAD onset, n | 0                  | 1                                                             | 1                                     | 2                                                                              | 0                                                                       | 0                                                                                                    |
| Steroid pulses after CLAD onset, n  | 0                  | 0                                                             | 1                                     | 0                                                                              | 0                                                                       | 0                                                                                                    |
| ATG before CLAD onset, n            | 0                  | 2                                                             | 0                                     | 0                                                                              | 1                                                                       | 0                                                                                                    |
| ATG after CLAD onset, n             | 1                  | 0                                                             | 1                                     | 1                                                                              | 0                                                                       | 0                                                                                                    |
| Total reflux <sup>b</sup>           | 31                 | 12                                                            | 27                                    | 18                                                                             | 35                                                                      | N/A                                                                                                  |
| CLAD phenotype <sup>c</sup>         | BOS                | Mixed                                                         | RAS                                   | RAS                                                                            | Undefined                                                               | BOS                                                                                                  |
| Time to CLAD, days                  | 170                | 779                                                           | 472                                   | 250                                                                            | 715                                                                     | 254                                                                                                  |
| Time from CLAD to re-Tx, days       | 334                | 391                                                           | 310                                   | 218                                                                            | 74                                                                      | 386                                                                                                  |
| Sum of A <sup>d</sup> grades        | 0                  | 1                                                             | 3                                     | 1                                                                              | 1                                                                       | 0                                                                                                    |
| Sum of B grades <sup>d</sup>        | 0                  | 0                                                             | 0                                     | 0                                                                              | 0                                                                       | 0                                                                                                    |

**Legend:**

Abbreviations: re-Tx, re-transplant; COPD, Chronic obstructive pulmonary disease; BPD, Bronchopulmonary Dysplasia; IS, immunosuppression; csa, cyclosporine A; aza, azathioprine; pred, prednisolone; mmf, mycophenolate mofetil; tac, tacrolimus; HLA, human leukocyte antigen; dnDSA, de novo donor-specific antibody; CMV, Cytomegalovirus; RSV, Respiratory syncytial virus; CLAD, chronic lung allograft dysfunction; ATG, anti-thymocyte globulin; BOS, bronchiolitis obliterans syndrome; RAS, restrictive allograft syndrome.

a: Microorganisms identified between first transplant and re-transplant are listed. Gram-negative pathogens are bolded. b: Number of reflux episodes as tested by 24-hour pH-impedance probe per protocol around 3 months post-transplant. 48 episodes in 24 hours were considered as clinically diagnostic of gastro-esophageal reflux by our clinical laboratory. c: CLAD phenotypes at time of CLAD onset were determined per the 2019 ISHLT consensus guidelines. D: Sums of A or B grades are based on the ISHLT A and B histological acute rejection grading of transbronchial biopsies obtained between transplant and re-Tx. Detailed grades are shown in figures 1A-F.

## Supplemental Table 2: Antibodies for flow cytometry

| Company        | Fluorochrome | Antigen | Catalog number | Clone    |
|----------------|--------------|---------|----------------|----------|
| BioLegend      | PE           | CD49b   | 103506         | HMa2     |
|                | BV510        | CD4     | 100449         | GK1.5    |
|                | BV605        | CD45    | 103140         | 30-F11   |
|                | BV650        | CD19    | 115541         | 6D5      |
|                | BV650        | CD86    | 105036         | GL-1     |
|                | PerCP-Cy5.5  | CD44    | 103032         | IM7      |
|                | PE-Cy7       | TCRb    | 109222         | H57-597  |
| eBioscience    | FITC         | CD3     | 11-0032-82     | 17A2     |
|                | APC          | IL17RA  | 17-7182-82     | PAJ-17R  |
|                | BV421        | Ly6g    | 562737         | 1A8      |
|                | eFluor 660   | IL17A   | 50-7177-82     | eBio17B7 |
|                | eFluor 780   | CD8     | 47-0081-82     | 53-6.7   |
|                | PerCP-Cy5.5  | IFNg    | 45-7311-82     | XMG1.2   |
| BD Biosciences | PE-CF594     | CD62L   | 562404         | MEL-14   |
|                | PE-CF594     | IL4     | 562450         | 11B11    |

### Supplemental Table 3: Primer pairs

| Transcript   | Forward              | Reverse                 |
|--------------|----------------------|-------------------------|
| Mouse PPIA   | GGTCAACCCCACCGTGTT   | GCTCGAAAGTTTTCTGCTGTCT  |
| Mouse IL17A  | CCTGGACTCTCCACCGCAA  | TTCCCTCCGCATTGACACAG    |
| Mouse IFNg   | GCAACAGCAAGGCGAAAAAG | CTCATTGAATGCTTGGCGCT    |
| Mouse CCSP   | CAGCTCAGCTTCTTCGGAC  | TGGTCTCTTGTGGGAGGGTA    |
| Mouse CXCL1  | ACCGAAGTCATAGCCCACTC | CTCCGTTACTTGGGGACACC    |
| Mouse IL17RA | CCTCATCACACTCATCGCCA | GCCGAGTAGACGATCCAGAC    |
| Mouse TIMP1  | TCGGACCTGGTCATAAGGGC | GCTTTCCATGACTGGGGTGT    |
| Mouse MMP9   | CTCTGCTGCCCCTTACCAG  | AGCGGTACAAGTATGCCTCTGC  |
| Mouse IL10   | AGAGCAAGGCAGTGGAGCAG | TGGCCTTGTTAGACACCTTGGTC |

## Supplemental Table 4: Histological grading system

| Histologic feature                                                                                                         | Score            | Severity | Features                                                                                          |
|----------------------------------------------------------------------------------------------------------------------------|------------------|----------|---------------------------------------------------------------------------------------------------|
| Peri-Airway Fibrosis (scored per airway)<br>Measure: Average score for each sample.                                        | 0                | None     | No fibrous tissue                                                                                 |
|                                                                                                                            | 1                | Minimal  | Fibrous tissue thickness = 1 mononuclear cell                                                     |
|                                                                                                                            | 2                | Mild     | Fibrous tissue thickness = 2 mononuclear cells                                                    |
|                                                                                                                            | 3                | Moderate | Fibrous tissue thickness = 3 mononuclear cells                                                    |
|                                                                                                                            | 4                | Severe   | Fibrous tissue thickness $\geq$ 4 mononuclear cells                                               |
| % airway obliterated                                                                                                       | Percent affected |          | Calculate as the total number of obliterated airways divided by the total airways in the section. |
| % lung fibrotic                                                                                                            | Percent affected |          | Estimate the percentage of the lung parenchyma affected by fibrosis.                              |
| Epithelial hyperplasia (=increased height of columnar epithelial cells, cell crowding, prominent secretory granules/mucin) | 0                | None     | Normal epithelium throughout                                                                      |
|                                                                                                                            | 1                | Minimal  | An occasional airway with epithelial hyperplasia                                                  |
|                                                                                                                            | 2                | Mild     | Approximately 10% of airways with epithelial hyperplasia                                          |
|                                                                                                                            | 3                | Moderate | Approximately 25% of airways with epithelial hyperplasia                                          |
|                                                                                                                            | 4                | Severe   | >25% of airways with epithelial hyperplasia                                                       |
| Epithelial flattening                                                                                                      | 0                | None     | Normal epithelium                                                                                 |
|                                                                                                                            | 1                | Minimal  | An occasional airway with flattened epithelium                                                    |
|                                                                                                                            | 2                | Mild     | Approximately 10% of airways with flattened epithelium                                            |
|                                                                                                                            | 3                | Moderate | Approximately 25% of airways with flattened epithelium                                            |
|                                                                                                                            | 4                | Severe   | >25% of airways with flattened epithelium                                                         |
| Epithelial destruction                                                                                                     | 0                | None     | Normal epithelium                                                                                 |
|                                                                                                                            | 1                | Minimal  | An occasional airway with destructed epithelium                                                   |
|                                                                                                                            | 2                | Mild     | Approximately 10% of airways with destructed epithelium                                           |
|                                                                                                                            | 3                | Moderate | Approximately 25% of airways with destructed epithelium                                           |
|                                                                                                                            | 4                | Severe   | >25% of airways with destructed epithelium                                                        |

## Supplemental Table 5: Antibodies for immunofluorescence

### Immunofluorescence for CD3 and MPO

| Primary antibodies |                             | Secondary antibodies              |                                           |
|--------------------|-----------------------------|-----------------------------------|-------------------------------------------|
| anti-CD3 antibody  | ab11089, Abcam, Toronto, ON | Goat anti-rat IgG, Alexa 555      | Thermo Fisher Scientific, Mississauga, ON |
| anti-MPO antibody  | Ab9535, Abcam               | Donkey anti-rabbit IgG, Alexa 488 | Thermo Fisher Scientific                  |

### Immunofluorescence for CCSP and $\alpha$ SMA

| Primary antibodies                         |                          | Secondary antibodies              |                          |
|--------------------------------------------|--------------------------|-----------------------------------|--------------------------|
| anti-CCSP antibody                         | sc-9772, Santa Cruze, CA | Donkey anti-rabbit IgG, Alexa 488 | Thermo Fisher Scientific |
| Cy3 conjugated anti- $\alpha$ SMA antibody | C6198, Sigma             | N/A                               | N/A                      |

### Immunofluorescence for IL17RA and $\alpha$ SMA in mouse lung

| Primary antibodies                         |                 | Secondary antibodies               |                          |
|--------------------------------------------|-----------------|------------------------------------|--------------------------|
| anti-IL17RA antibody                       | ab218249, Abcam | Alexa 488 SuperBoost™ tyramide kit | Thermo Fisher Scientific |
| Cy3 conjugated anti- $\alpha$ SMA antibody | C6198, Sigma    | N/A                                | N/A                      |

### Immunofluorescence for IL17RA and CD45 in mouse lung

| Primary antibodies   |                 | Secondary antibodies               |                          |
|----------------------|-----------------|------------------------------------|--------------------------|
| anti-IL17RA antibody | ab218249, Abcam | Alexa 488 SuperBoost™ tyramide kit | Thermo Fisher Scientific |
| anti-CD45 antibody   | ab10558, Abcam  | Donkey anti-rabbit IgG, Alexa 555  | Thermo Fisher Scientific |

### Immunofluorescence for IL17RA and Collagen in mouse lung

| Primary antibodies       |                 | Secondary antibodies               |                          |
|--------------------------|-----------------|------------------------------------|--------------------------|
| anti-IL17RA antibody     | ab218249, Abcam | Alexa 488 SuperBoost™ tyramide kit | Thermo Fisher Scientific |
| anti-Collagen I antibody | ab34710, Abcam  | Donkey anti-rabbit IgG, Alexa 555  | Thermo Fisher Scientific |

### Immunofluorescence for IL17RA and CD31 in mouse lung

| Primary antibodies                                                                    |                              | Secondary antibodies               |                          |
|---------------------------------------------------------------------------------------|------------------------------|------------------------------------|--------------------------|
| anti-IL17RA antibody                                                                  | ab218249, Abcam              | Alexa 488 SuperBoost™ tyramide kit | Thermo Fisher Scientific |
| anti-CD31 antibody                                                                    | AF3628, Novus, Littleton, CO | Donkey anti-rabbit IgG, Alexa 555  | Thermo Fisher Scientific |
| Immunofluorescence for IL17RA and LYVE1 in mouse lung                                 |                              |                                    |                          |
| Primary antibodies                                                                    |                              | Secondary antibodies               |                          |
| anti-IL17RA antibody                                                                  | ab218249, Abcam              | Alexa 488 SuperBoost™ tyramide kit | Thermo Fisher Scientific |
| anti-LYVE1 antibody                                                                   | NB110-61026, Novus           | Donkey anti-rabbit IgG, Alexa 555  | Thermo Fisher Scientific |
| Immunofluorescence for IL17RA and LYVE1 in mouse lung                                 |                              |                                    |                          |
| Primary antibodies                                                                    |                              | Secondary antibodies               |                          |
| anti-IL17RA antibody                                                                  | ab218249, Abcam              | Alexa 488 SuperBoost™ tyramide kit | Thermo Fisher Scientific |
| anti-LYVE1 antibody                                                                   | NB110-61026, Novus           | Gaot anti-rabbit IgG, Alexa 555    | Thermo Fisher Scientific |
| Immunofluorescence for IL17RA and CD45 in human lung for quantification               |                              |                                    |                          |
| Primary antibodies                                                                    |                              | Secondary antibodies               |                          |
| anti-IL17RA antibody                                                                  | ab218249, Abcam              | Alexa 488 SuperBoost™ tyramide kit | Thermo Fisher Scientific |
| anti-CD45 antibody                                                                    | ab10558, Abcam               | Donkey anti-rabbit IgG, Alexa 555  | Thermo Fisher Scientific |
| Immunofluorescence for IL17RA and $\alpha$ SMA in human lung for representative image |                              |                                    |                          |
| Primary antibodies                                                                    |                              | Secondary antibodies               |                          |
| anti-IL17RA antibody                                                                  | ab180904, Abcam              | Alexa 488 SuperBoost™ tyramide kit | Thermo Fisher Scientific |
| Cy3 conjugated anti- $\alpha$ SMA antibody                                            | C6198, Sigma                 | N/A                                | N/A                      |
| Immunofluorescence for IL17RA and CD45 in human lung for representative image         |                              |                                    |                          |
| Primary antibodies                                                                    |                              | Secondary antibodies               |                          |
| anti-IL17RA antibody                                                                  | ab180904, Abcam              | Alexa 488 SuperBoost™ tyramide kit | Thermo Fisher Scientific |

|                                                                                   |                 |                                    |                          |
|-----------------------------------------------------------------------------------|-----------------|------------------------------------|--------------------------|
| anti-CD45 antibody                                                                | ab10558, Abcam  | Donkey anti-rabbit IgG, Alexa 555  | Thermo Fisher Scientific |
| Immunofluorescence for IL17RA and Collagen in human lung for representative image |                 |                                    |                          |
| Primary antibodies                                                                |                 | Secondary antibodies               |                          |
| anti-IL17RA antibody                                                              | ab180904, Abcam | Alexa 488 SuperBoost™ tyramide kit | Thermo Fisher Scientific |
| anti-Collagen I antibody                                                          | ab233080, Abcam | Donkey anti-rabbit IgG, Alexa 555  | Thermo Fisher Scientific |
